# Supplementary material for: Prognosis and Treatment of Plasmablastic Lymphoma in the United States: A Multicenter Retrospective Study
Source: Research Square preprint supplement (doi:10.21203/rs.3.rs-7607922/v1), 2025-09-30
Supplement: Supplementary file 1 [file 9d3ad8d93668197b5623ffda.pdf]

**Supplemental Table 1. Treatment Modalities**

| Frontline*                                                                                                                                                   |                             |
|--------------------------------------------------------------------------------------------------------------------------------------------------------------|-----------------------------|
| Regimen                                                                                                                                                      | n                           |
| CHOP/CHOP-like                                                                                                                                               | 44                          |
| EPOCH                                                                                                                                                        | 220                         |
| <u>High Intensity</u><br>Hyper-CVAD<br>CODOX-M/IVAC                                                                                                          | 13<br>13                    |
| <u>Other</u><br>Other multi-agent regimen<br>Low-intensity myeloma regimen<br>Radiation alone<br>Surgery alone<br>Biologic agent alone<br>EBV-targeting CTLs | 15<br>4<br>9<br>4<br>3<br>1 |
| <u>None</u><br>Palliative/hospice<br>ART alone                                                                                                               | 12<br>2                     |
| Unknown                                                                                                                                                      | 4                           |

\*

Low-intensity Myeloma Regimen: anti-CD38 agent, proteasome inhibitor, and/or immunomodulatory agent-based regimen

Other multi-agent regimen = multi-agent, high-dose chemotherapy not consistent with other categories (e.g. VDT-PACE, bendamustine-based regimens, multi-agent cyclophosphamide-based regimens, etc.)

**\*\***

ICE = Ifosfamide, Carboplatin, and Etoposide

DHAP/Similar = DHAP, DHAC, DHAX, or ESHAP

(cytarabine, platinum-based agent, and glucocorticoid)

Low-intensity Myeloma Regimen = anti-CD38 agent,  
proteasome inhibitor, and/or immunomodulatory agent-  
based regimen

GemOx/Similar = GemOx, GIFOx, GDP, or GemCarbo  
(gemcitabine and platinum-based agent)

| Second-line**                 |    |
|-------------------------------|----|
| Regimen                       | n  |
| ICE                           | 30 |
| DHAP/similar                  | 23 |
| Low-intensity myeloma regimen | 19 |
| GemOx/similar                 | 8  |
| <u>Other</u>                  |    |
| EPOCH                         | 5  |
| CHOP/CHOP-like                | 2  |
| Hyper-CVAD                    | 6  |
| CODOX-M/IVAC                  | 3  |
| Radiation alone               | 5  |
| Other                         | 12 |

**Supplemental Table 2. Unadjusted and Propensity Score Adjusted Characteristics by Immune Status Cohort**  
(three group propensity score model)

|                         | Unadjusted    | Unadjusted    | Unadjusted    | Adjusted      | Adjusted      | Adjusted      |
|-------------------------|---------------|---------------|---------------|---------------|---------------|---------------|
|                         | HIV           | IC            | OIS           | HIV           | IC            | OIS           |
|                         | Mean (SD)     |
| IPI at diagnosis        |               |               |               |               |               |               |
| Mean (SD)               | 2.44 (1.30)   | 2.40 (1.60)   | 2.87 (1.37)   | 2.52 (1.34)   | 2.41 (1.52)   | 2.37 (1.42)   |
| Age at Dx (years)       |               |               |               |               |               |               |
| Mean (SD)               | 45.66 (10.37) | 63.86 (16.51) | 62.72 (17.09) | 48.92 (12.85) | 58.66 (17.05) | 53.90 (18.29) |
| Year of diagnosis       |               |               |               |               |               |               |
| Mean (SD)               | 2015.3 (4.5)  | 2016.9 (3.6)  | 2017.58 (3.6) | 2015.8 (4.4)  | 2016.7 (3.8)  | 2016.7 (3.6)  |
|                         | N (%)         | N (%)         | N (%)         | %             | %             | %             |
| Race                    |               |               |               |               |               |               |
| Non-Black               | 118 (72.0%)   | 114 (91.5%)   | 31 (84.9%)    | 74.3%         | 87.0%         | 77.7%         |
| Black                   | 46 (28.0%)    | 11 (8.5%)     | 5 (15.1%)     | 25.7%         | 13.0%         | 22.3%         |
| Sex                     |               |               |               |               |               |               |
| Male                    | 141 (86.0%)   | 94 (75.2%)    | 22 (61.1%)    | 85.9%         | 75.1%         | 66.9%         |
| Female                  | 23 (14.0%)    | 31 (24.8%)    | 14 (38.9%)    | 14.1%         | 24.9%         | 33.1%         |
| Ethnicity               |               |               |               |               |               |               |
| Hispanic                | 65 (39.7%)    | 42 (33.3%)    | 14 (38.5%)    | 40.9%         | 36.0%         | 37.0%         |
| Non-Hispanic            | 99 (60.3%)    | 83 (66.7%)    | 22 (61.5%)    | 59.1%         | 64.0%         | 63.0%         |
| MYC and EBV             |               |               |               |               |               |               |
| MYC+/EBV+               | 74 (44.8%)    | 27 (21.5%)    | 6 (15.6%)     | 38.6%         | 25.1%         | 23.4%         |
| MYC+/EBV-               | 21 (12.6%)    | 37 (29.5%)    | 14 (40.1%)    | 16.3%         | 27.8%         | 30.0%         |
| MYC-/EBV+               | 56 (33.9%)    | 31 (24.5%)    | 7 (20.6%)     | 32.5%         | 25.2%         | 26.8%         |
| MYC-/EBV-               | 14 (8.7%)     | 31 (24.5%)    | 9 (23.8%)     | 12.6%         | 21.9%         | 19.7%         |
| 1L Chemotherapy Regimen |               |               |               |               |               |               |
| CHOP                    | 20 (12.0%)    | 18 (14.6%)    | 11 (31.4%)    | 10.4%         | 14.2%         | 19.7%         |
| EPOCH                   | 113 (68.6%)   | 83 (66.2%)    | 21 (58.8%)    | 67.0%         | 66.3%         | 72.8%         |
| Other                   | 32 (19.4%)    | 24 (19.2%)    | 4 (9.9%)      | 22.5%         | 19.4%         | 7.6%          |
| PI in 1L                |               |               |               |               |               |               |
| No                      | 117 (71.3%)   | 80 (64.0%)    | 28 (77.8%)    | 66.1%         | 67.4%         | 71.1%         |
| Yes                     | 47 (28.7%)    | 45 (36.0%)    | 8 (22.2%)     | 33.9%         | 32.6%         | 28.9%         |
| Radiation in 1L         |               |               |               |               |               |               |
| No                      | 143 (86.9%)   | 89 (71.3%)    | 30 (83.3%)    | 80.6%         | 74.7%         | 82.7%         |
| Yes                     | 21 (13.1%)    | 36 (28.7%)    | 6 (16.7%)     | 19.4%         | 25.3%         | 17.3%         |
| CNS ppx                 |               |               |               |               |               |               |
| None                    | 85 (52.1%)    | 76 (61.1%)    | 29 (80.8%)    | 54.2%         | 59.1%         | 75.6%         |
| IT                      | 58 (35.3%)    | 36 (28.9%)    | 6 (15.8%)     | 34.6%         | 30.9%         | 21.4%         |
| HD IV                   | 21 (12.7%)    | 12 (10.0%)    | 1 (3.3%)      | 11.2%         | 10.0%         | 3.0%          |

|                     |             |             |            |       |       |       |
|---------------------|-------------|-------------|------------|-------|-------|-------|
| Ann Arbor Stage     |             |             |            |       |       |       |
| I/II                | 35 (21.3%)  | 42 (33.3%)  | 8 (22.2%)  | 20.9% | 26.6% | 26.4% |
| III/IV              | 129 (78.7%) | 83 (66.7%)  | 28 (77.8%) | 79.1% | 73.4% | 73.6% |
| ECOG PS 2+          |             |             |            |       |       |       |
| No                  | 120 (73.0%) | 93 (74.5%)  | 26 (73.5%) | 70.3% | 75.5% | 84.3% |
| Yes                 | 44 (27.0%)  | 32 (25.5%)  | 10 (26.5%) | 29.7% | 24.5% | 15.7% |
| LDH > 3x ULN        |             |             |            |       |       |       |
| No                  | 124 (75.4%) | 105 (84.3%) | 28 (77.5%) | 78.5% | 82.5% | 77.2% |
| Yes                 | 40 (24.6%)  | 20 (15.7%)  | 8 (22.5%)  | 21.5% | 17.5% | 22.8% |
| 2+ Extranodal Sites |             |             |            |       |       |       |
| No                  | 84 (51.4%)  | 70 (55.7%)  | 22 (61.1%) | 48.6% | 52.9% | 54.9% |
| Yes                 | 80 (48.6%)  | 55 (44.3%)  | 14 (38.9%) | 51.4% | 47.1% | 45.1% |

**Supplemental Table 3. Unadjusted and Propensity Score Adjusted Characteristics by Immune Status Cohort**  
(two group propensity score model)

|                         | Unadjusted   | Unadjusted    | Adjusted     | Adjusted      |
|-------------------------|--------------|---------------|--------------|---------------|
|                         | HIV          | IC            | HIV          | IC            |
|                         | Mean (SD)    | Mean (SD)     | Mean (SD)    | Mean (SD)     |
| IPI at diagnosis        |              |               |              |               |
| Mean (SD)               | 2.43 (1.29)  | 1.98 (1.62)   | 2.25 (1.38)  | 2.02 (1.52)   |
| Age at Dx (years)       |              |               |              |               |
| Mean (SD)               | 45.30 (9.95) | 54.46 (14.32) | 46.84 (9.71) | 42.10 (17.66) |
| Year of diagnosis       |              |               |              |               |
| Mean (SD)               | 2015.2 (4.5) | 2016.5 (4.0)  | 2015.5 (4.5) | 2016.1 (3.6)  |
|                         | N (%)        | N (%)         | %            | %             |
| Race                    |              |               |              |               |
| Non-Black               | 117 (72.3%)  | 70 (92.1%)    | 76.9%        | 78.8%         |
| Black                   | 45 (27.7%)   | 6 (7.9%)      | 23.1%        | 21.2%         |
| Sex                     |              |               |              |               |
| Male                    | 139 (85.8%)  | 58 (76.3%)    | 82.9%        | 80.7%         |
| Female                  | 23 (14.2%)   | 18 (23.7%)    | 17.1%        | 19.3%         |
| Ethnicity               |              |               |              |               |
| Hispanic                | 64 (39.2%)   | 24 (31.9%)    | 36.2%        | 27.5%         |
| Non-Hispanic            | 98 (60.8%)   | 52 (68.1%)    | 63.8%        | 72.5%         |
| MYC and EBV             |              |               |              |               |
| MYC+/EBV+               | 73 (45.1%)   | 15 (19.9%)    | 39.0%        | 35.5%         |
| MYC+/EBV-               | 20 (12.5%)   | 24 (31.1%)    | 16.7%        | 19.1%         |
| MYC-/EBV+               | 55 (34.0%)   | 18 (24.0%)    | 31.3%        | 29.0%         |
| MYC-/EBV-               | 14 (8.4%)    | 19 (25.0%)    | 13.0%        | 16.5%         |
| 1L Chemotherapy Regimen |              |               |              |               |
| CHOP                    | 20 (12.1%)   | 7 (9.5%)      | 10.8%        | 7.9%          |
| EPOCH                   | 112 (68.9%)  | 53 (69.5%)    | 69.0%        | 72.6%         |
| Other                   | 31 (19.0%)   | 16 (20.9%)    | 20.2%        | 19.6%         |
| PI in 1L                |              |               |              |               |
| No                      | 116 (71.6%)  | 42 (55.3%)    | 68.2%        | 72.9%         |
| Yes                     | 46 (28.4%)   | 34 (44.7%)    | 31.8%        | 27.1%         |
| Radiation in 1L         |              |               |              | 0.0%          |
| No                      | 142 (87.4%)  | 50 (65.5%)    | 82.9%        | 78.1%         |
| Yes                     | 20 (12.6%)   | 26 (34.5%)    | 17.1%        | 21.9%         |
| CNS ppx                 |              |               |              |               |
| None                    | 84 (52.0%)   | 45 (58.7%)    | 54.8%        | 62.7%         |
| IT                      | 57 (35.5%)   | 25 (32.3%)    | 34.2%        | 29.9%         |
| HD IV                   | 20 (12.6%)   | 7 (9.0%)      | 10.9%        | 7.4%          |

|                     |             |            |       |       |
|---------------------|-------------|------------|-------|-------|
| Ann Arbor Stage     |             |            |       |       |
| I/II                | 35 (21.6%)  | 28 (36.4%) | 25.9% | 19.4% |
| III/IV              | 127 (78.4%) | 48 (63.6%) | 74.1% | 80.6% |
| ECOG PS 2+          |             |            |       |       |
| No                  | 119 (73.3%) | 62 (81.9%) | 76.0% | 84.0% |
| Yes                 | 43 (26.7%)  | 14 (18.1%) | 24.0% | 16.0% |
| LDH > 3x ULN        |             |            |       |       |
| No                  | 122 (75.1%) | 65 (84.9%) | 78.7% | 87.7% |
| Yes                 | 40 (24.9%)  | 12 (15.1%) | 21.3% | 12.3% |
| 2+ Extranodal Sites |             |            |       |       |
| No                  | 84 (52.0%)  | 46 (60.0%) | 53.1% | 56.0% |
| Yes                 | 78 (48.0%)  | 30 (40.0%) | 46.9% | 44.0% |

The two group model was conducted as a sensitivity analysis to see if results changed after achieving better balance for these groups than in the three-group model.

**Supplemental Table 4. Additional univariable survival analyses using non-imputed data.**

| Risk Factor                         | Univariable Analysis, OS |            |              |
|-------------------------------------|--------------------------|------------|--------------|
|                                     | HR                       | 95% CI     | p-value*     |
| Nodal disease                       | 1.63                     | 1.15-2.31  | <b>0.006</b> |
| BM involvement                      | 1.73                     | 1.21-2.48  | <b>0.003</b> |
| CNS involvement                     | 1.67                     | 0.81-3.43  | 0.165        |
| H&N involvement                     | 0.45                     | 0.31-0.67  | <b>0.000</b> |
| <u>IPI (vs 0)</u>                   |                          |            |              |
| 1                                   | 1.07                     | 0.39-2.94  | 0.902        |
| 2                                   | 2.34                     | 0.96-5.69  | 0.061        |
| 3                                   | 3.63                     | 1.55-8.51  | <b>0.003</b> |
| 4                                   | 7.19                     | 3.02-17.12 | <b>0.000</b> |
| 5                                   | 8.42                     | 3.08-22.99 | <b>0.000</b> |
| CD19+                               | 1.14                     | 0.58-2.25  | 0.712        |
| CD20+                               | 1.12                     | 0.66-1.92  | 0.657        |
| CD30+                               | 1.26                     | 0.83-1.92  | 0.278        |
| CD38+                               | 0.94                     | 0.46-1.95  | 0.877        |
| CD138+                              | 0.86                     | 0.53-1.39  | 0.531        |
| Ki67                                | 1.01                     | 0.99-1.02  | 0.064        |
| Consolidative RT in 1st Remission   | 0.57                     | 0.37-0.88  | <b>0.012</b> |
| Consolidative ASCT in 1st Remission | 0.45                     | 0.22-0.92  | <b>0.029</b> |

\*Boded p-values are statistically significant

**Supplemental Figure 1. Survival outcomes using a binary propensity score logistic regression in a two-group model.**

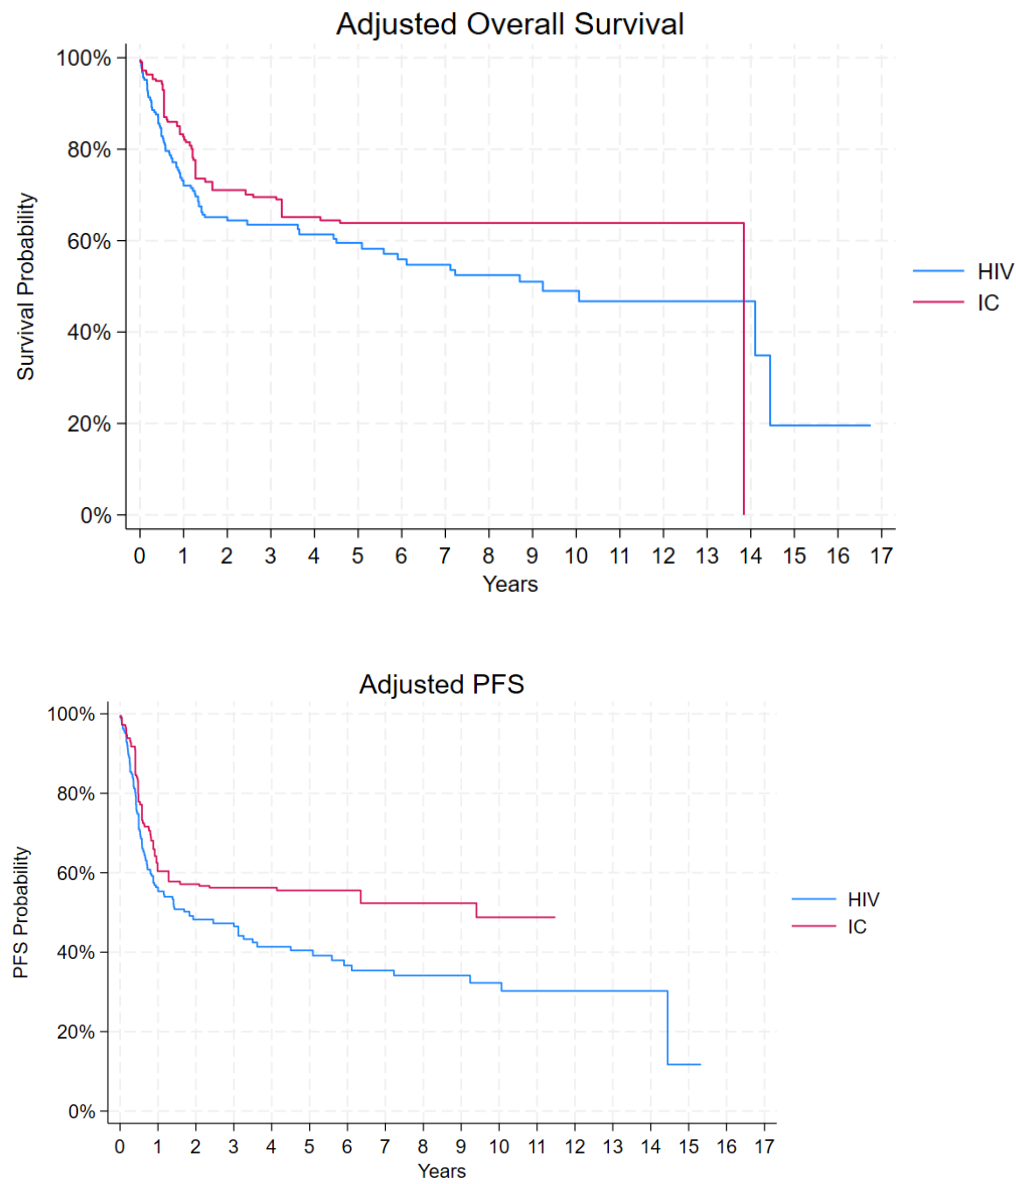

Adjusted OS (a), Adjusted PFS (b)
